# Supplementary material for: The glucagon-like peptide-1 (GLP-1) analogue semaglutide reduces alcohol drinking and modulates central GABA neurotransmission
Source: PubMed Central journal article supplement (PMC10371247; doi:10.1172/jci.insight.170671), 2023-06-22
Supplement: jciinsight-8-170671-s142.pdf [file jciinsight-8-170671-s142.pdf]

## Supplementary Information

Chuong V<sup>^</sup>, Farokhnia M<sup>^</sup>, Khom S<sup>^</sup>, Pince CL, Elvig SK, Vlkolinsky R, Marchette RCN, Koob GF, Roberto M<sup>\*</sup>, Vendruscolo LF<sup>\*</sup>, Leggio L<sup>\*</sup>. The glucagon-like peptide-1 (GLP-1) analogue semaglutide reduces alcohol drinking and modulates central GABA neurotransmission.

<sup>^</sup>co-first author, <sup>\*</sup>co-senior author

### Table of Contents:

- **Table S1.** Semaglutide reduced chow and water intake in mice.
- **Figure S1.** Semaglutide reduced spontaneous locomotion but had no effect on motor coordination, alcohol-induced ataxia, or blood alcohol levels in mice.
- **Figure S2.** Chronic intermittent ethanol vapor exposure enhanced GABA neurotransmission in central nucleus of the amygdala (CeA) and infralimbic cortex (ILC) neurons from male rats.
- **Table S2.** Comparison of baseline spontaneous inhibitory postsynaptic currents (sIPSC) characteristics in (A) central nucleus of the amygdala (CeA) and (B) infralimbic cortex neurons (ILC) neurons between alcohol-naïve and alcohol-dependent male rats.

**Table S1.** Semaglutide reduced chow and water intake in mice.

| <b>Treatment</b>                | <b>Chow (g/kg)</b> | <b>Water (mL/kg)</b> |
|---------------------------------|--------------------|----------------------|
| <b>Vehicle</b>                  | 139.9 ± 7.4        | 146.6 ± 9.5          |
| <b>Semaglutide, 0.001 mg/kg</b> | 122.5 ± 8.2        | 97.4 ± 9.5 (***)     |
| <b>Semaglutide, 0.003 mg/kg</b> | 93.1 ± 7.2 (****)  | 98.6 ± 6.3 (***)     |
| <b>Semaglutide, 0.01 mg/kg</b>  | 66.2 ± 7.4 (****)  | 73.1 ± 6.1 (****)    |
| <b>Semaglutide, 0.03 mg/kg</b>  | 39.6 ± 5.6 (****)  | 48.1 ± 6.7 (****)    |
| <b>Semaglutide, 0.1 mg/kg</b>   | 38.2 ± 7.9 (****)  | 45.8 ± 6.7 (****)    |

Chow and water intake were examined in mice that were previously drinking unsweet alcohol ( $n = 7$  males and 8 females). All data are expressed as mean ± SEM and were analyzed using one-way repeated-measures ANOVAs. \*\*\* $p < 0.001$ , \*\*\*\* $p < 0.0001$ , vs. Vehicle.

**Figure S1.** Semaglutide reduced spontaneous locomotion but had no effect on motor coordination, alcohol-induced ataxia, or blood alcohol levels in mice.

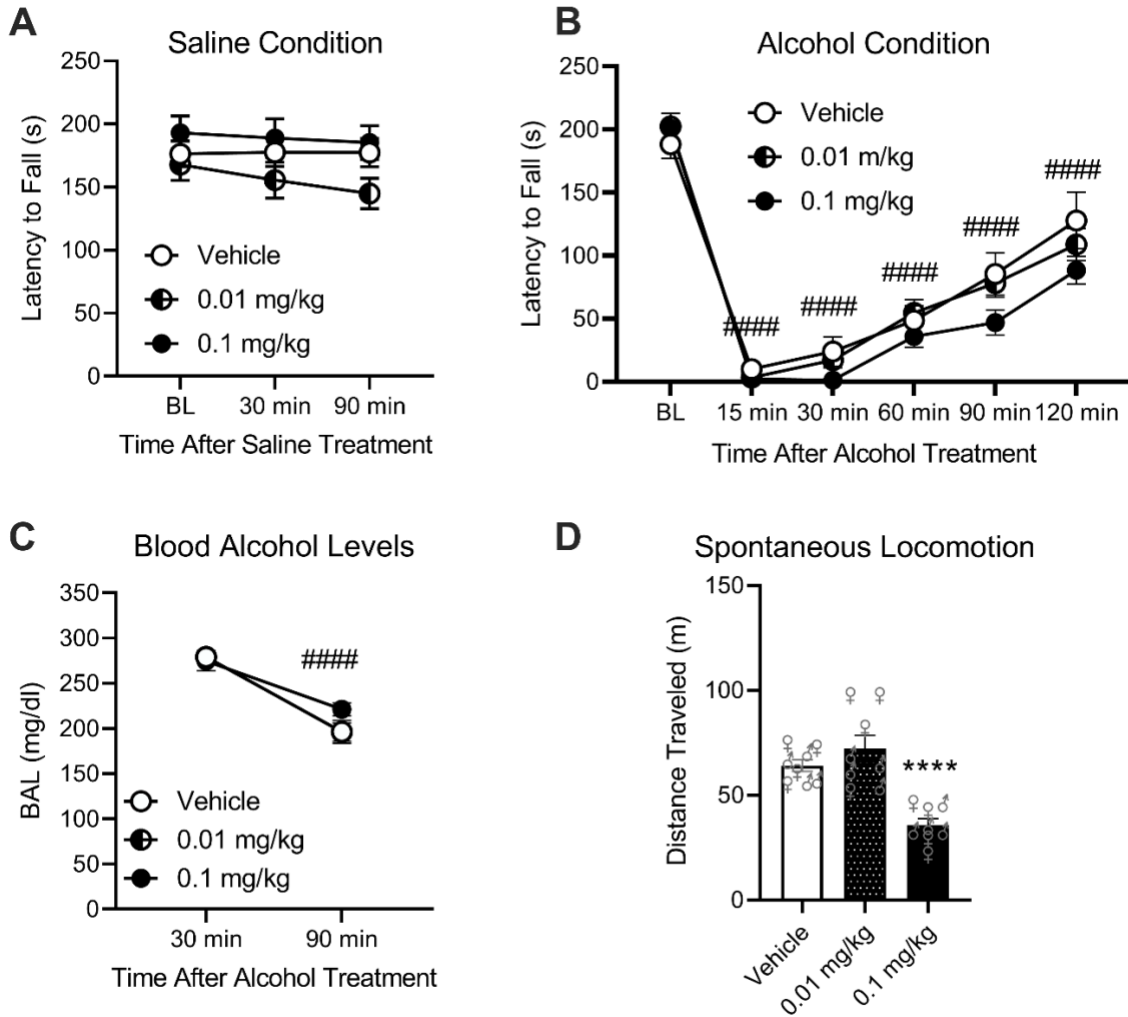

(A) Semaglutide did not disrupt motor coordination in mice. (B) Intraperitoneal alcohol administration resulted in significant motor impairment (i.e., alcohol-induced ataxia) in mice. Semaglutide had no effect on alcohol-induced ataxia on the rotarod. (C) Semaglutide had no effect on blood alcohol levels (BALs) 30 min and 90 min after intraperitoneal alcohol administration. Males ( $n = 8$ ); females ( $n = 7$ ). (D) Semaglutide at 0.1 mg/kg decreased spontaneous locomotion in the circular corridor as measured by the total distance traveled. Males ( $n = 4$ ); females ( $n = 7$ ). \*\*\*\* $p < 0.0001$ , vs. Vehicle. #####  $p < 0.0001$ , different from baseline (BL; A and B) and 30 min (C). Data are expressed as mean  $\pm$  SEM and were analyzed using one- or two-way repeated-measures ANOVAs.

**Figure S2.** Chronic intermittent ethanol vapor exposure enhanced GABA neurotransmission in central nucleus of the amygdala (CeA) and infralimbic cortex (ILC) neurons from male rats.

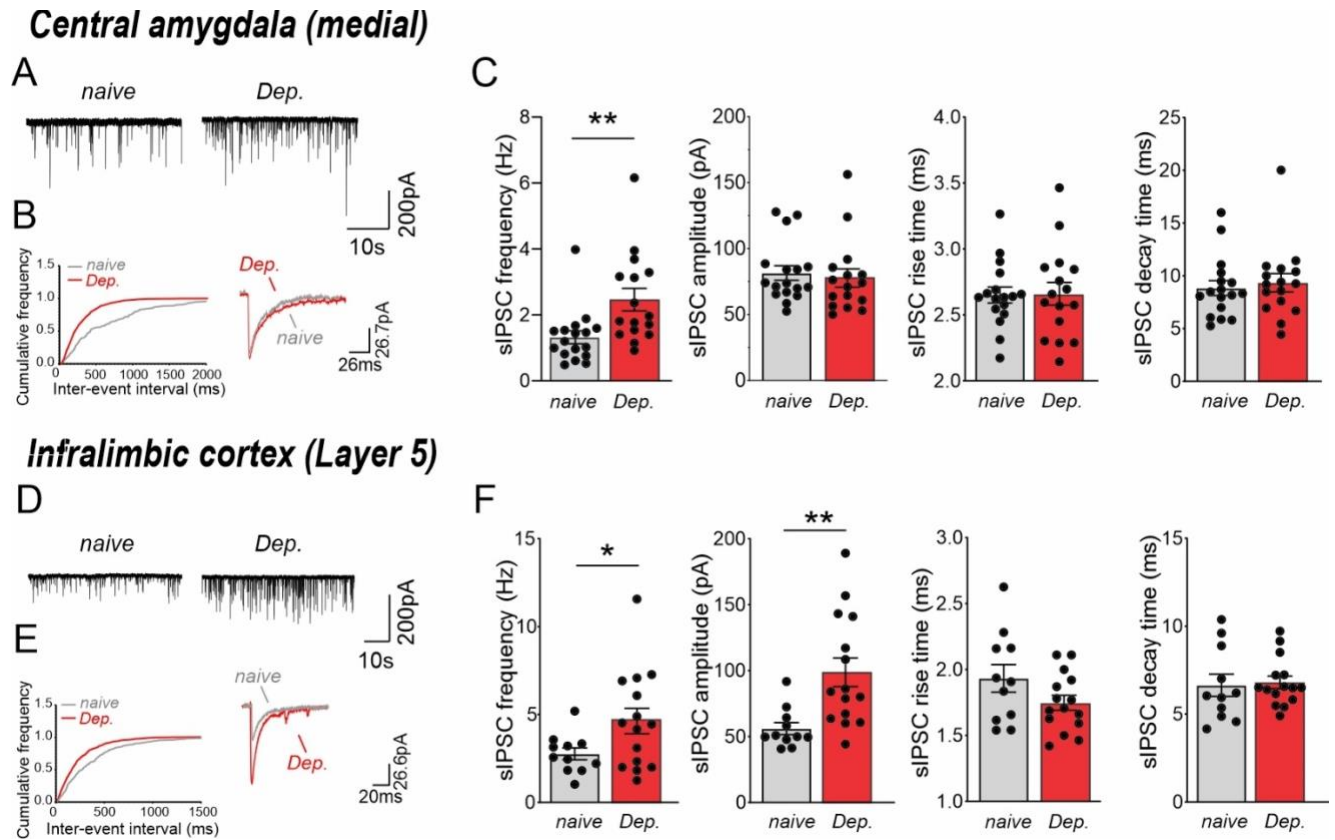

(A) Representative spontaneous inhibitory postsynaptic currents (sIPSC) traces of central nucleus of the amygdala (CeA) neurons. (B) cumulative frequency distributions and scaled sIPSC averages from the traces depicted in (A) for CeA neurons of alcohol-naïve or alcohol-dependent rats. (C) Mean  $\pm$  SEM of sIPSC frequencies, amplitudes, rise, and decay times in CeA neurons of alcohol-naïve or alcohol-dependent rats. (D) Representative sIPSC traces of infralimbic cortex (ILC) neurons. (E) cumulative frequency distributions and scaled sIPSC averages from the traces depicted in (D) for ILC neurons of alcohol-naïve or alcohol-dependent rats. (F) Mean  $\pm$  SEM of sIPSC frequencies, amplitudes, rise, and decay times in ILC neurons of alcohol-naïve or alcohol-dependent rats. Data were generated from 16-17 CeA and 11-15 ILC neurons. \* $p < 0.05$ , \*\* $p < 0.01$ , alcohol-naïve vs. alcohol-dependent; unpaired Student's  $t$ -tests (two-tailed). Alcohol-naïve rats ( $n = 8$ ), alcohol-dependent rats ( $n = 10$ ).

**Table S2.** Comparison of baseline spontaneous inhibitory postsynaptic currents (sIPSC) characteristics in (A) central nucleus of the amygdala (CeA) and (B) infralimbic cortex neurons (ILC) neurons between alcohol-naïve and alcohol-dependent male rats.

| (A) CeA                    | Alcohol-naïve | Alcohol-dependent  |
|----------------------------|---------------|--------------------|
| <b>Number of cells (n)</b> | 17            | 16                 |
| <b>Frequency (Hz)</b>      | 1.32 ± 0.20   | 2.46 ± 0.34 (**)   |
| <b>Amplitude (pA)</b>      | 81.44 ± 5.53  | 77.67 ± 6.96       |
| <b>Rise time (ms)</b>      | 2.65 ± 0.06   | 2.66 ± 0.09        |
| <b>Decay time (ms)</b>     | 8.84 ± 0.70   | 9.34 ± 0.87        |
|                            |               |                    |
| (B) ILC                    | Alcohol-naïve | Alcohol-dependent  |
| <b>Number of cells (n)</b> | 11            | 15                 |
| <b>Frequency (Hz)</b>      | 2.76 ± 0.34   | 4.63 ± 0.72 (*)    |
| <b>Amplitude (pA)</b>      | 56.03 ± 4.55  | 98.71 ± 10.91 (**) |
| <b>Rise time (ms)</b>      | 1.93 ± 0.10   | 1.75 ± 0.06        |
| <b>Decay time (ms)</b>     | 6.64 ± 0.63   | 6.80 ± 0.35        |

\* $p < 0.05$ , \*\* $p < 0.01$ , alcohol-naïve vs. alcohol-dependent; unpaired Student's  $t$ -tests (two-tailed). Alcohol-naïve rats ( $n = 8$ ), alcohol-dependent rats ( $n = 10$ ).
